# Supplementary material for: Effective increase in the refractive index of novel transparent silicone hybrid films by introduction of functionalized silicon nanoparticles
Source: Royal Society of Chemistry journal article supplement (doi:10.1039/c5ra09668e), 2015-01-01
Supplement: c5ra09668e1.pdf [file c5ra09668e1.pdf]

## Electronic Supplementary Information

### **Effective increase in refractive index of novel transparent silicone hybrid films by introduction of functionalized silicon nanoparticles**

Guoyan Zhang,<sup>‡a,b</sup> Mei Chen,<sup>‡a</sup> Jibin Zhang,<sup>b</sup> Baofeng He,<sup>\*a</sup> Huai Yang<sup>\*a</sup>  
and Bai Yang<sup>\*b</sup>

<sup>a</sup>Department of Materials Science and Engineering, College of Engineering, Peking University, Beijing 100871, P. R. China.

E-mail: [yanghuai@coe.pku.edu.cn](mailto:yanghuai@coe.pku.edu.cn).

<sup>b</sup>State Key Laboratory of Supramolecular Structure and Materials, College of Chemistry, Jilin University, Changchun, 130012, P. R. China.

E-mail: [byangchem@jlu.edu.cn](mailto:byangchem@jlu.edu.cn).

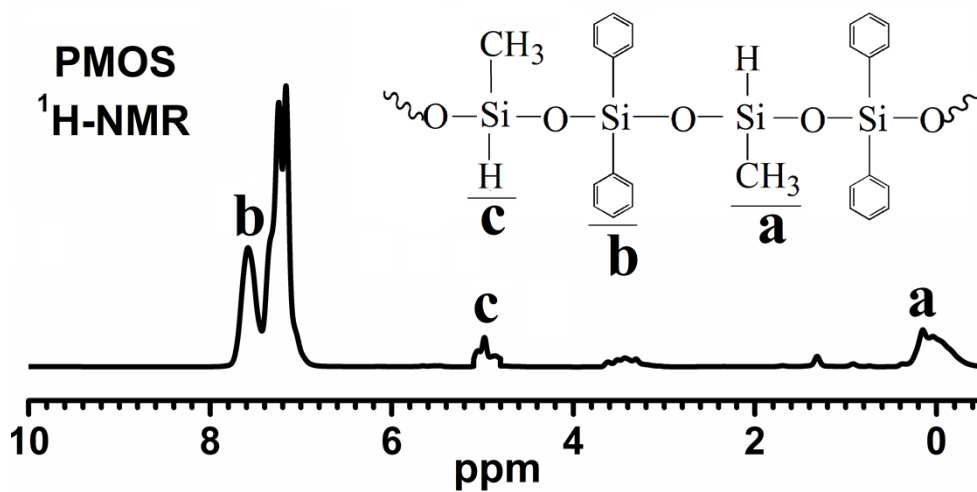

**Fig. S1** <sup>1</sup>H-NMR spectrum of the prepared PMOS using chloroform-*d* as solvent.

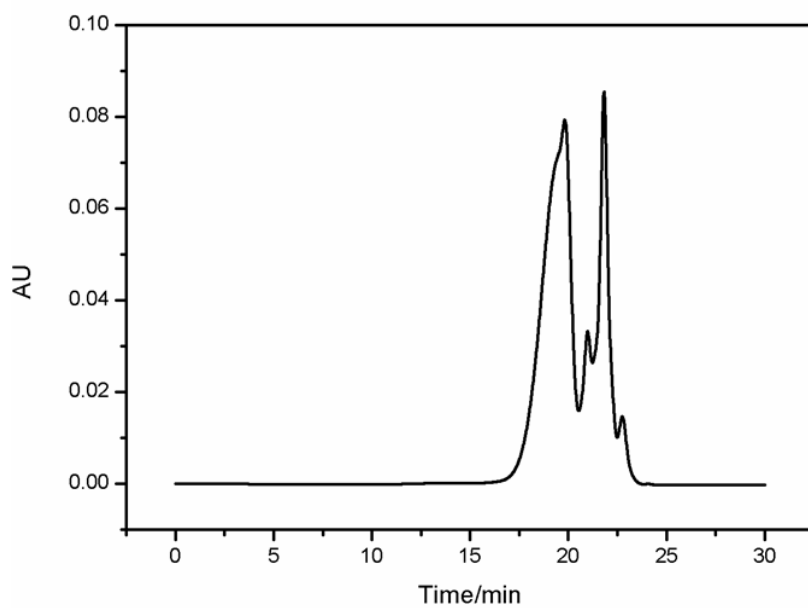

**Fig. S2** GPC result of the prepared PMOS (Mn:887, Mw: 1068, Mw/Mn = 1.2)

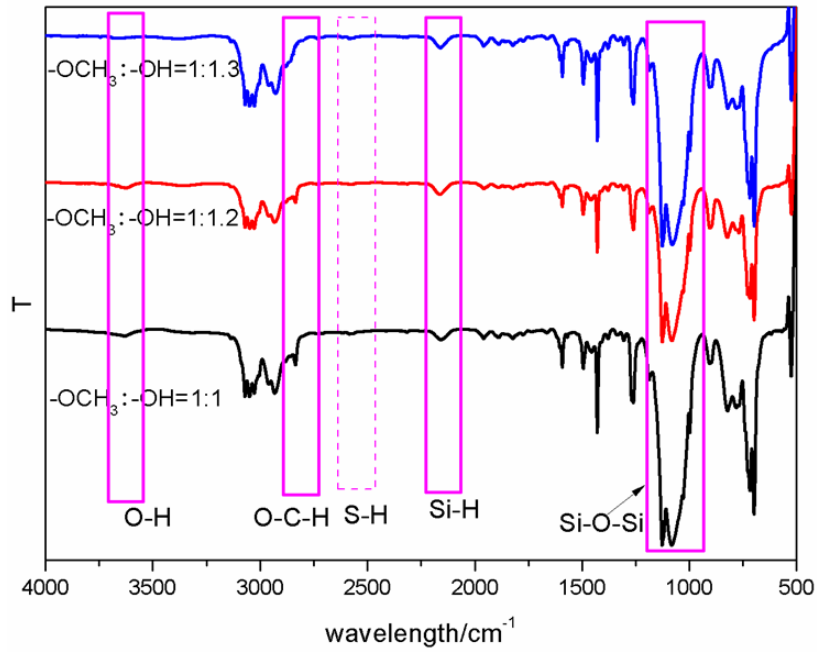

**Fig.S3** FT-IR spectra of the prepared PMOS with different molar ratio of DMMS and DPSD: 1:1, 1:1.2, 1:1.3.

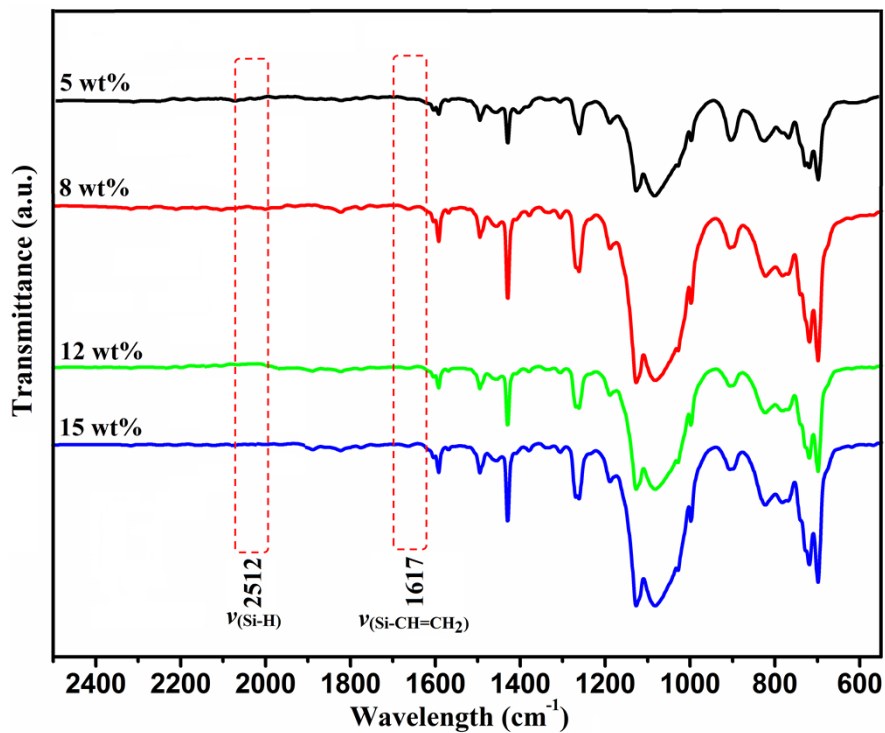

**Fig. S4** FT-IR spectra of the prepared novel silicone hybrid films with different weight content of Si NPs.

**Table S1** Selected optical and thermal properties of silicone hybrid films

| Vinyl-Si<br>NPs<br>(wt%) <sup>a</sup> | residue<br>(wt%) <sup>b</sup> | $T_d$<br>(°C) <sup>c</sup> | Pencil<br>hardness | $T\%$<br>at 550<br>nm <sup>d</sup> | n<br>at 589<br>nm <sup>d</sup> | n<br>at 632.8<br>nm <sup>d</sup> |
|---------------------------------------|-------------------------------|----------------------------|--------------------|------------------------------------|--------------------------------|----------------------------------|
| 0                                     | 6.3                           | 375                        | 2H                 | 96.5                               | 1.632                          | 1.563                            |
| 5                                     | 7.8                           | 368                        | 2H                 | 94.4                               | 1.715                          | 1.621                            |
| 8                                     | 10.1                          | 379                        | 2H-3H              | 93.8                               | 1.748                          | 1.643                            |
| 12                                    | 15.1                          | 366                        | 2H-3H              | 91.7                               | 1.789                          | 1.692                            |
| 15                                    | 17.8                          | 373                        | 3H                 | 89.6                               | 1.823                          | 1.727                            |

<sup>a</sup> Theoretical weight content of Si NPs in films. <sup>b</sup> Char yield of the films at 800 °C. <sup>c</sup> Initial decomposition temperatures of the films. <sup>d</sup> The silicone hybrid films with a thickness about 0.1 mm.

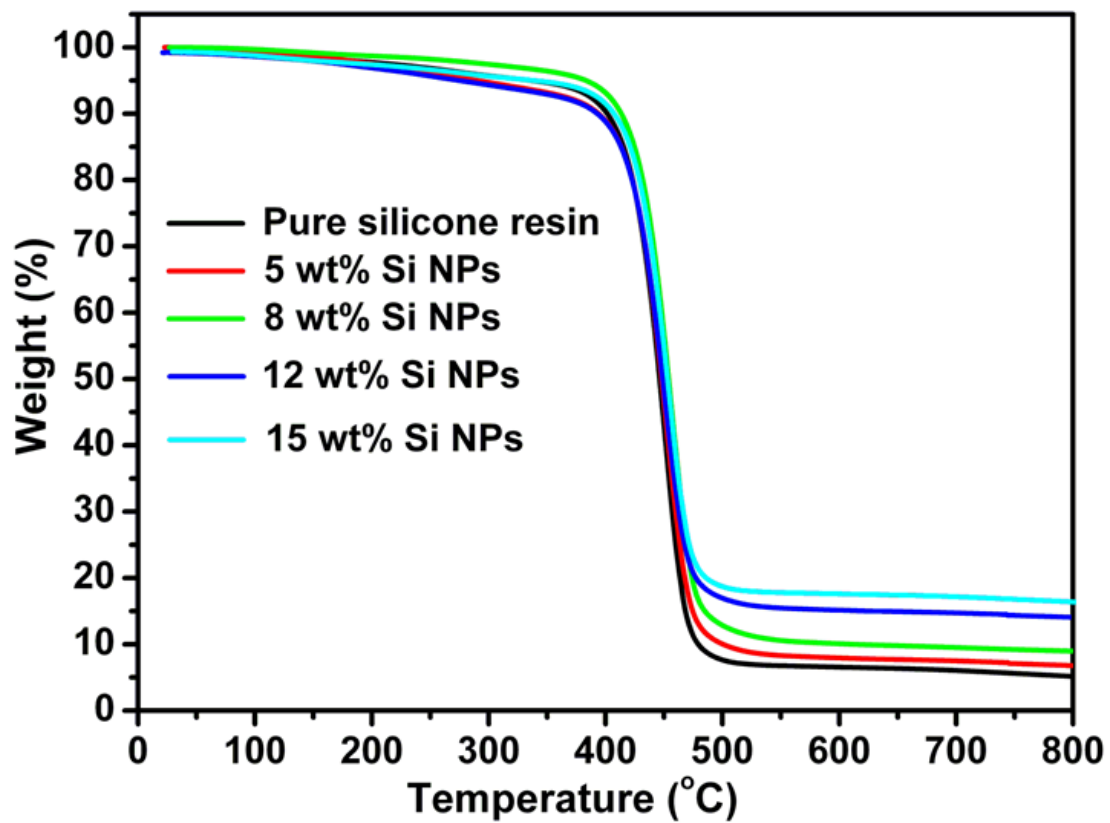

**Fig. S5** TGA curves of the silicone hybrid films containing different amounts of Si NPs.
